# Supplementary material
Source: Springer Nature journal article supplement (https://mijn.bsl.nl/resource/supplementary/13047_2008_87_MOESM3_ESM.pdf/7109568)

**Air samples**

**Meat 2**

**1 min**

**2 min**

**3 min**

**4 min**

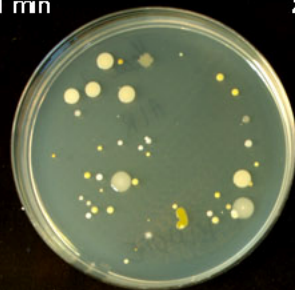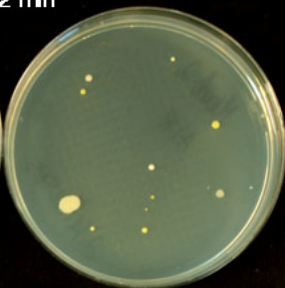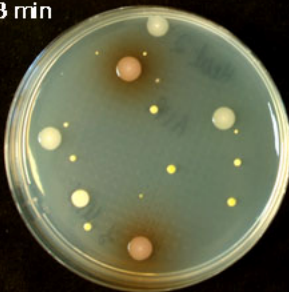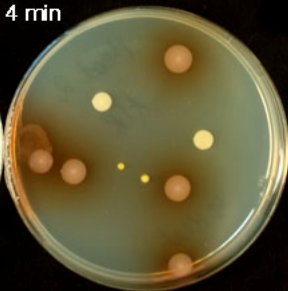

Supplement: MOESM3 [file 7109568]
